# Supplementary material for: Erythropoietin and retinopathy of prematurity: a retrospective cohort study in Japan, 2008-2018
Source: Research Square preprint supplement (doi:10.21203/rs.3.rs-3131832/v1), 2023-07-11
Supplement: Supplementary file 1 [file e0338e391f534f8d60152124.docx]

| **Supplemental eTable 1. Sensitivity analysis using different thresholds for excluding early deaths** | | | |
| --- | --- | --- | --- |
|  | Death within 28 days | Death within 14 days | Death within 42 days |
|  | Adjusted OR (95%CI) | Adjusted OR (95%CI) | Adjusted OR (95%CI) |
| ROP | 1.46 (1.25 - 1.71) | 1.59 (1.36 - 1.86) | 1.25 (1.07 - 1.47) |
| Death or ROP | 1.00 (0.88 - 1.14) | 0.68 (0.60 - 0.77) | 1.12 (0.97 - 1.29) |
| Death | 0.13 (0.10 - 0.16) | 0.07 (0.06 - 0.09) | 0.21 (0.16 - 0.27) |
| NEC | 0.29 (0.23 - 0.37) | 0.27 (0.22 - 0.33) | 0.34 (0.26 - 0.44) |
| CLD | 1.60 (1.38 - 1.86) | 1.53 (1.31 - 1.78) | 1.42 (1.22 - 1.66) |
| Death or CLD | 0.99 (0.86 - 1.14) | 0.72 (0.63 - 0.82) | 1.08 (0.93 - 1.25) |
| Abbreviations: CI, confidence interval; CLD, chronic lung disease; NEC, necrotizing enterocolitis; OR, odds ratio; ROP, retinopathy of prematurity. | | | |

| **Supplemental eTable 2. Cause of death before discharge** | | | | |
| --- | --- | --- | --- | --- |
|  | Erythropoietin group  n=14 373 | | Control group  n=1658 | |
| CLD | 112 | 0.8% | 20 | 1.2% |
| Sepsis | 54 | 0.4% | 41 | 2.5% |
| NEC | 45 | 0.3% | 45 | 2.7% |
| IVH | 4 | 0.0% | 15 | 0.9% |
| Others | 87 | 0.6% | 70 | 4.2% |
| Unknown | 32 | 0.2% | 24 | 1.4% |
| Abbreviations: CLD, chronic lung disease; IVH, intraventricular hemorrhage; NEC, necrotizing enterocolitis. | | | | |
